# Supplementary material for: Production of green diesel from catalytic deoxygenation of chicken fat oil over a series binary metal oxide-supported MWCNTs
Source: Royal Society of Chemistry journal article supplement (doi:10.1039/c9ra08409f), 2020-01-01
Supplement: c9ra08409f1.pdf [file c9ra08409f1.pdf]

**List of Supplementary Table**

**Table S1.** GC-MS concentration (wt %) of the deoxygenated liquid product

**Table S2.** GC-MS concentration (wt %) of the deoxygenated product catalysed by Ni<sub>10</sub>-Mg<sub>15</sub>/MWCNT and Ni<sub>10</sub>-Mn<sub>5</sub>/MWCNT

**Table S1.** GC-MS concentration (wt.%) of the deoxygenated liquid product

| Catalyst                              | Compound group                                        | Compound name                          | Concentration (%) |  |
|---------------------------------------|-------------------------------------------------------|----------------------------------------|-------------------|--|
| MWCNT                                 | Carboxylic acid                                       | n-Hexadecanoic acid                    | 1.278             |  |
|                                       |                                                       | Trifluoroacetic acid, pentadecyl ester | 0.367             |  |
|                                       | Ketone                                                | 2-Nonadecanone                         | 0.909             |  |
|                                       | Alcohol                                               | n-Tetracosanol-1                       | 1.205             |  |
|                                       |                                                       | 1-Heptacosanol                         | 2.635             |  |
|                                       |                                                       | 9-Octadecanol, (E)-                    | 0.168             |  |
|                                       |                                                       | 9-Hexadecanol, (E)-                    | 0.212             |  |
|                                       | Cyclic Hydrocarbon (C <sub>8</sub> -C <sub>20</sub> ) | Cyclopropane                           | 3.769             |  |
|                                       |                                                       | n-Nonylcyclohexane                     | 1.454             |  |
|                                       |                                                       | Cyclohexene                            | 0.586             |  |
|                                       |                                                       | Cyclopentane                           | 0.592             |  |
|                                       |                                                       | Bicyclohexyl                           | 0.324             |  |
|                                       |                                                       | Cyclohexane                            | 0.221             |  |
|                                       | Hydrocarbon (C <sub>8</sub> -C <sub>20</sub> )        | <b><u>Saturated Hydrocarbon</u></b>    |                   |  |
|                                       |                                                       | Nonane                                 | 3.845             |  |
|                                       |                                                       | Undecane                               | 2.046             |  |
|                                       |                                                       | Dodecane                               | 2.376             |  |
|                                       |                                                       | Tridecane                              | 4.806             |  |
|                                       |                                                       | Tetradecane                            | 5.294             |  |
|                                       |                                                       | Pentadecane                            | 31.508            |  |
| Hexadecane                            |                                                       | 1.927                                  |                   |  |
| Heptadecane                           |                                                       | 0.269                                  |                   |  |
| <b><u>Unsaturated Hydrocarbon</u></b> |                                                       |                                        |                   |  |
| 1-Nonene                              |                                                       |                                        |                   |  |
| 1-Decene                              |                                                       | 0.726                                  |                   |  |
| 1-Undecene                            |                                                       | 0.661                                  |                   |  |
| 1-Tridecene                           |                                                       | 0.996                                  |                   |  |
| 1-Tetradecene                         |                                                       | 1.389                                  |                   |  |
| 7-Tetradecene                         |                                                       | 1.901                                  |                   |  |
| 9-Octadecene, (E)-                    |                                                       |                                        |                   |  |
| 1-Pentadecene                         |                                                       | 2.061                                  |                   |  |
| 5-Eicosene, (E)-                      |                                                       | 1.362                                  |                   |  |
| 3-Heptadecene, (Z)-                   |                                                       | 0.247                                  |                   |  |
| 1-Octadecene                          | 6.895                                                 |                                        |                   |  |
| 7-Heptadecene                         | 0.283                                                 |                                        |                   |  |
| 9-Eicosene, (E)-                      | 0.269                                                 |                                        |                   |  |
|                                       | 2.094                                                 |                                        |                   |  |
| Heavy Hydrocarbon                     | Hexacosane                                            | 0.380                                  |                   |  |
|                                       | 9-Tricosene, (Z)-                                     | 1.707                                  |                   |  |

|                                                   |                                                             |                                                                                                                       |                                                    |
|---------------------------------------------------|-------------------------------------------------------------|-----------------------------------------------------------------------------------------------------------------------|----------------------------------------------------|
|                                                   | (C <sub>21</sub> -C <sub>24</sub> )                         |                                                                                                                       |                                                    |
| Ni <sub>10</sub> /<br>MWCNT                       | Carboxylic acid                                             | Trifluoroacetic acid, pentadecyl ester                                                                                | 1.284                                              |
|                                                   | Alcohol                                                     | 1-Undecanol                                                                                                           | 3.782                                              |
|                                                   | Cyclic<br>Hydrocarbon<br>(C <sub>8</sub> -C <sub>20</sub> ) | Cyclopropane<br>Benzene, pentyl-<br>Cyclopentane<br>Cyclododecene, (Z)-<br>Benzene, (1-methyldecyl)-<br>n-cyclohexane | 2.272<br>1.939<br>1.069<br>0.614<br>1.413<br>1.540 |
| Ni <sub>10</sub> -Mn <sub>10</sub> /<br>MWCNT     | Hydrocarbon<br>(C <sub>8</sub> -C <sub>20</sub> )           | <b><u>Saturated Hydrocarbon</u></b>                                                                                   |                                                    |
|                                                   |                                                             | Octane                                                                                                                | 1.056                                              |
|                                                   |                                                             | Nonane                                                                                                                | 3.206                                              |
|                                                   |                                                             | Undecane                                                                                                              | 2.815                                              |
|                                                   |                                                             | Dodecane                                                                                                              | 3.001                                              |
|                                                   |                                                             | Tetradecane                                                                                                           | 8.395                                              |
|                                                   |                                                             | Hexadecane                                                                                                            | 7.963                                              |
|                                                   |                                                             | Heptadecane                                                                                                           | 14.109                                             |
|                                                   |                                                             | <b><u>Unsaturated Hydrocarbon</u></b>                                                                                 |                                                    |
|                                                   |                                                             | 1-Nonene                                                                                                              | 0.696                                              |
|                                                   |                                                             | 1-Decene                                                                                                              | 0.951                                              |
|                                                   |                                                             | 1-Undecene                                                                                                            | 1.797                                              |
|                                                   |                                                             | 3-Dodecene, (E)-                                                                                                      | 1.997                                              |
|                                                   |                                                             | 1-Tridecene                                                                                                           | 1.366                                              |
|                                                   |                                                             | 1-Tetradecene                                                                                                         | 0.955                                              |
|                                                   |                                                             | 7-Tetradecene                                                                                                         | 7.419                                              |
|                                                   |                                                             | 1-Heptadecene                                                                                                         | 4.512                                              |
| 9-Octadecene, (E)-                                | 0.861                                                       |                                                                                                                       |                                                    |
| 3-Heptadecene, (Z)-                               | 15.028                                                      |                                                                                                                       |                                                    |
| 5-Heptadecene                                     | 0.675                                                       |                                                                                                                       |                                                    |
| Ni <sub>10</sub> -Mn <sub>10</sub> /<br>MWCNT     | Ketone                                                      | 2-Nonadecanone                                                                                                        | 0.748                                              |
|                                                   | Alcohol                                                     | 1-Undecanol                                                                                                           | 3.536                                              |
|                                                   |                                                             | n-Tridecan-ol                                                                                                         | 1.915                                              |
|                                                   | Cyclic<br>Hydrocarbon<br>(C <sub>8</sub> -C <sub>20</sub> ) | Cyclopentene,                                                                                                         | 2.35                                               |
|                                                   |                                                             | Benzene, pentyl-                                                                                                      | 1.507                                              |
| Cyclopropane                                      |                                                             | 1.024                                                                                                                 |                                                    |
| n-Nonylcyclohexane                                |                                                             | 0.948                                                                                                                 |                                                    |
| Cyclopentane                                      |                                                             | 0.702                                                                                                                 |                                                    |
| Cyclododecanemethanol                             | 0.474                                                       |                                                                                                                       |                                                    |
| Hydrocarbon<br>(C <sub>8</sub> -C <sub>20</sub> ) | <b><u>Saturated Hydrocarbon</u></b>                         |                                                                                                                       |                                                    |
|                                                   | Nonane                                                      | 1.005                                                                                                                 |                                                    |
|                                                   | Undecane                                                    | 2.165                                                                                                                 |                                                    |
|                                                   | Dodecane                                                    | 1.639                                                                                                                 |                                                    |
|                                                   | Tetradecane                                                 | 5.180                                                                                                                 |                                                    |
|                                                   | Hexadecane                                                  | 35.07                                                                                                                 |                                                    |
| Heptadecane                                       | 9.032                                                       |                                                                                                                       |                                                    |

|                                               |                                                       |                                                                                                                                                                                                                                                                                                      |                                                                                                                                  |
|-----------------------------------------------|-------------------------------------------------------|------------------------------------------------------------------------------------------------------------------------------------------------------------------------------------------------------------------------------------------------------------------------------------------------------|----------------------------------------------------------------------------------------------------------------------------------|
|                                               |                                                       | <b><u>Unsaturated Hydrocarbon</u></b><br>1-Decene<br>Trans-3-Decene<br>1-Undecene<br>3-Dodecene, (E)-<br>1-Tridecene<br>1-Tetradecene<br>9-Octadecene, (E)-<br>1-Pentadecene<br>3-Heptadecene, (Z)-<br>5-Heptadecene<br>9-Eicosene, (E)-                                                             | 0.857<br>0.747<br>1.560<br>0.440<br>0.750<br>0.651<br>2.625<br>1.961<br>10.807<br>0.829<br>0.150                                 |
| Ni <sub>10</sub> -Mg <sub>10</sub> /<br>MWCNT | Carboxylic acid                                       | Dichloroacetic acid<br>Trifluoroacetic acid                                                                                                                                                                                                                                                          | <b>0.918</b><br><b>0.370</b>                                                                                                     |
|                                               | Ketone                                                | 9-Octadecanone<br>2-Pentadecanone<br>3-Octadecanone<br>8-Octadecanone<br>9-Heptadecanone<br>10-Nonadecanone                                                                                                                                                                                          | 0.319<br>1.716<br>0.387<br>0.452<br>0.508<br>0.318                                                                               |
|                                               | Alcohol                                               | 1-Undecanol<br>1-Dodecanol<br>Octacosanol<br>1-Heptacosanol                                                                                                                                                                                                                                          | 1.792<br>0.800<br>0.557<br>1.405                                                                                                 |
|                                               | Cyclic Hydrocarbon (C <sub>8</sub> -C <sub>20</sub> ) | Cyclopropane<br>n-Nonylcyclohexane<br>Cyclohexene<br>Cyclopentane<br>Cyclohexane<br>Cyclohexadecane                                                                                                                                                                                                  | 0.952<br>1.455<br>0.474<br>1.136<br>0.894<br>11.490                                                                              |
|                                               | Hydrocarbon (C <sub>8</sub> -C <sub>20</sub> )        | <b><u>Saturated Hydrocarbon</u></b><br>Nonane<br>Undecane<br>Dodecane<br>Tetradecane<br>Hexadecane<br>Heptadecane<br><br><b><u>Unsaturated Hydrocarbon</u></b><br>1-Decene<br>1-Undecene<br>1-Tridecene<br>1-Tetradecene<br>7-Tetradecene<br>9-Octadecene, (E)-<br>1-Pentadecene<br>9-Eicosene, (E)- | 1.121<br>1.122<br>1.742<br>4.641<br>35.348<br>11.490<br><br>0.370<br>0.802<br>0.810<br>0.810<br>1.371<br>2.807<br>0.587<br>1.037 |

|                                                       |                                                       |                                                       |                          |
|-------------------------------------------------------|-------------------------------------------------------|-------------------------------------------------------|--------------------------|
|                                                       |                                                       | 5-Eicosene, (E)-<br>3-Heptadecene, (Z)-<br>5-Eicosyne | 0.126<br>10.466<br>0.279 |
|                                                       | Heavy Hydrocarbon (C <sub>21</sub> -C <sub>24</sub> ) | 9-Tricosene, (Z)-                                     | 1.005                    |
| Ni <sub>10</sub> -Ce <sub>10</sub> /<br>MWCNT         | Carboxylic acid                                       | Malonic acid                                          | 0.617                    |
|                                                       | Ketone                                                | 2-Nonadecanone                                        | 0.612                    |
|                                                       | Alcohol                                               | 1-Undecanol                                           | 2.205                    |
|                                                       |                                                       | 1-Dodecanol                                           | 0.814                    |
|                                                       |                                                       | n-Pentadecanol                                        | 4.810                    |
|                                                       |                                                       | n-Tetracosanol                                        | 0.516                    |
| Cyclic Hydrocarbon (C <sub>8</sub> -C <sub>20</sub> ) | Cyclopropane                                          | 0.771                                                 |                          |
|                                                       | Heptane, 1,1-dicyclohexyl                             | 0.450                                                 |                          |
|                                                       | n-Nonylcyclohexane                                    | 1.143                                                 |                          |
|                                                       | Cyclopentane                                          | 1.25                                                  |                          |
| Hydrocarbon (C <sub>8</sub> -C <sub>20</sub> )        | <b><u>Saturated Hydrocarbon</u></b>                   |                                                       |                          |
|                                                       | Octane                                                | 2.255                                                 |                          |
|                                                       | Nonane                                                | 6.671                                                 |                          |
|                                                       | Undecane                                              | 2.466                                                 |                          |
|                                                       | Dodecane                                              | 1.423                                                 |                          |
|                                                       | Tetradecane                                           | 4.373                                                 |                          |
|                                                       | Hexadecane                                            | 35.564                                                |                          |
|                                                       | Heptadecane                                           | 10.995                                                |                          |
|                                                       | <b><u>Unsaturated Hydrocarbon</u></b>                 |                                                       |                          |
|                                                       | 1-Nonene                                              | 1.196                                                 |                          |
|                                                       | 1-Decene                                              | 0.761                                                 |                          |
|                                                       | 2-Decene                                              | 0.526                                                 |                          |
|                                                       | 1-Undecene                                            | 0.950                                                 |                          |
|                                                       | 1-Tetradecene                                         | 0.631                                                 |                          |
|                                                       | 7-Tetradecene                                         | 1.278                                                 |                          |
|                                                       | 9-Octadecene, (E)-                                    | 2.269                                                 |                          |
|                                                       | 1-Pentadecene                                         | 2.568                                                 |                          |
|                                                       | 5-Octadecene, (E)-                                    | 0.436                                                 |                          |
|                                                       | 3-Heptadecene, (Z)-                                   | 3.780                                                 |                          |
|                                                       | 5-Heptadecene                                         | 0.463                                                 |                          |
| Ni <sub>10</sub> -Cu <sub>10</sub> /<br>MWCNT         | Carboxylic acid                                       | Nonanoic acid                                         | <b>0.046</b>             |
|                                                       | Ketone                                                | 2-Nonadecanone                                        | 0.462                    |
|                                                       | Alcohol                                               | 1-Undecanol                                           | 2.189                    |
| 1-Dodecanol                                           |                                                       | 0.993                                                 |                          |
| n-Heptadecanol                                        |                                                       | 2.958                                                 |                          |

|                                                       |                                                                                                                                                                                                                                                                                                                                                                                |                                                                                                                                                                              |
|-------------------------------------------------------|--------------------------------------------------------------------------------------------------------------------------------------------------------------------------------------------------------------------------------------------------------------------------------------------------------------------------------------------------------------------------------|------------------------------------------------------------------------------------------------------------------------------------------------------------------------------|
| Cyclic Hydrocarbon (C <sub>8</sub> -C <sub>20</sub> ) | Cyclopentene<br>Benzene<br>Cyclopropane<br>Cyclopentane<br>n-Pentadecyclohexane<br>Cyclohexene<br>Cyclopentane<br>Cyclohexane                                                                                                                                                                                                                                                  | 1.240<br>1.113<br>0.786<br>0.588<br>1.017<br>0.227<br>0.631<br>0.441                                                                                                         |
| Hydrocarbon (C <sub>8</sub> -C <sub>20</sub> )        | <b><u>Saturated Hydrocarbon</u></b><br>Octane<br>Nonane<br>Undecane<br>Dodecane<br>Tridecane<br>Tetradecane<br>Hexadecane<br><br><b><u>Unsaturated Hydrocarbon</u></b><br>1-Octene<br>1-Nonene<br>2-Nonene, (E)-<br>1-Decene<br>2-Decene, (E)-<br>1-Undecene<br>1-Tridecene<br>7-Tetradecene<br>9-Octadecene, (E)-<br>1-Pentadecene<br>9-Eicosene, (E)-<br>3-Heptadecene, (Z)- | 0.505<br>10.177<br>6.03<br>2.125<br>4.547<br>3.431<br>29.845<br><br>0.505<br>1.686<br>0.861<br>0.976<br>0.617<br>1.112<br>1.031<br>0.294<br>1.367<br>1.901<br>0.972<br>0.972 |
| Heavy Hydrocarbon (C <sub>21</sub> -C <sub>24</sub> ) | Tetracosane<br>9-Tricosene,(Z)-<br>Heneicosane                                                                                                                                                                                                                                                                                                                                 | 0.706<br>0.656<br>0.630                                                                                                                                                      |

**Table S2.** GC-MS concentration (wt.%) of the deoxygenated product catalysed by Ni<sub>10</sub>-Mg<sub>15</sub>/MWCNT and Ni<sub>10</sub>-Mn<sub>5</sub>/MWCNT

| Catalyst                                  | Compound group                                        | Compound name                              | Concentration (%) |
|-------------------------------------------|-------------------------------------------------------|--------------------------------------------|-------------------|
| Ni <sub>10</sub> -Mg <sub>15</sub> /MWCNT | Ketone                                                | 2-Pentadecanone                            | 3.215             |
|                                           |                                                       | 3-Octadecanone                             | 0.692             |
|                                           |                                                       | 2-Nonadecanone                             | 0.714             |
|                                           |                                                       | 9-Heptadecanone                            | 0.498             |
|                                           |                                                       | 10-Nonadecanone                            | 0.241             |
|                                           | Alcohol                                               | n-Pentadecanol                             | 10.040            |
|                                           |                                                       | Oleyl alcohol                              | 1.575             |
|                                           |                                                       | Z-(13,14-Epoxy)tetradec-11-en-1-ol acetate | 0.745             |
|                                           |                                                       | 1-Heneicosanol                             | 0.069             |
|                                           |                                                       | Octacosanol                                | 0.780             |
|                                           | Cyclic Hydrocarbon (C <sub>8</sub> -C <sub>20</sub> ) | Cyclopropane                               | 4.267             |
|                                           |                                                       | n-Nonylcyclohexane                         | 1.498             |
|                                           |                                                       | Cyclohexene                                | 0.511             |
|                                           |                                                       | Cyclopentane                               | 1.146             |
|                                           |                                                       | Cyclohexane                                | 0.567             |
|                                           | Hydrocarbon (C <sub>8</sub> -C <sub>20</sub> )        | <b><u>Saturated Hydrocarbon</u></b>        |                   |
|                                           |                                                       | Nonane                                     | 1.840             |
|                                           |                                                       | Undecane                                   | 3.944             |
|                                           |                                                       | Dodecane                                   | 1.927             |
|                                           |                                                       | Tridecane                                  | 5.862             |
|                                           |                                                       | Tetradecane                                | 3.865             |
|                                           |                                                       | Hexadecane                                 | 9.222             |
|                                           |                                                       | Heptadecane                                | 16.427            |
|                                           |                                                       | Octadecane                                 | 0.751             |
|                                           |                                                       | <b><u>Unsaturated Hydrocarbon</u></b>      |                   |
|                                           |                                                       | 1-Nonene                                   | 0.461             |
|                                           |                                                       | 1-Decene                                   | 0.550             |
|                                           |                                                       | 1-Undecene                                 | 1.008             |
|                                           |                                                       | 1-Tridecene                                | 1.603             |
|                                           |                                                       | 1-Tetradecene                              | 1.060             |
|                                           |                                                       | 7-Tetradecene                              | 2.347             |
|                                           |                                                       | 9-Octadecene, (E)-                         | 5.638             |
|                                           |                                                       | 1-Pentadecene                              | 2.539             |
|                                           |                                                       | 5-Eicosene, (E)-                           | 0.326             |
|                                           |                                                       | 3-Heptadecene, (Z)-                        | 10.368            |
|                                           |                                                       | 5-Octadecene, (E)-                         | 0.346             |
|                                           |                                                       | 5-Heptadecene                              | 0.412             |
| 9-Eicosene, (E)-                          | 0.287                                                 |                                            |                   |
| Ni <sub>10</sub> -Mn <sub>5</sub> /       | Carboxylic acid                                       | Malanoic acid, 2-heptyl tetradecyl ester   | 0.761             |

|       |                                                       |                                       |        |
|-------|-------------------------------------------------------|---------------------------------------|--------|
| MWCNT | Ketone                                                | 2-Pentadecanone                       | 2.950  |
|       |                                                       | 3-Octadecanone                        | 0.515  |
|       |                                                       | 2-Nonadecanone                        | 0.609  |
|       |                                                       | 8-Pentadecanone                       | 0.318  |
|       |                                                       | 9-Heptadecanone                       | 0.324  |
|       |                                                       | 10-Nonadecanone                       | 0.183  |
|       | Alcohol                                               | n-Pentadecanol                        | 8.836  |
|       |                                                       | n-Nonadecanol-1                       | 0.413  |
|       |                                                       | 1-Heneicosanol                        | 0.156  |
|       |                                                       | Octacosanol                           | 0.452  |
|       | Cyclic Hydrocarbon (C <sub>8</sub> -C <sub>20</sub> ) | Furan, 2-butyltetrahydro-             | 1.352  |
|       |                                                       | Cyclopropane                          | 4.473  |
|       |                                                       | n-Nonylcyclohexane                    | 1.396  |
|       |                                                       | Cyclohexene                           | 0.463  |
|       |                                                       | Bicyclohexyl                          | 0.472  |
|       |                                                       | Cyclohexane                           | 0.592  |
|       |                                                       | Benzene, (1-methyldecyl)-             | 1.255  |
|       | Hydrocarbon (C <sub>8</sub> -C <sub>20</sub> )        | <b><u>Saturated Hydrocarbon</u></b>   |        |
|       |                                                       | Octane                                | 1.031  |
|       |                                                       | Nonane                                | 2.797  |
|       |                                                       | Undecane                              | 4.516  |
|       |                                                       | Dodecane                              | 1.917  |
|       |                                                       | Tridecane                             | 5.500  |
|       |                                                       | Tetradecane                           | 3.080  |
|       |                                                       | Hexadecane                            | 11.149 |
|       |                                                       | Heptadecane                           | 15.967 |
|       |                                                       | Nonadecane                            | 0.645  |
|       |                                                       | <b><u>Unsaturated Hydrocarbon</u></b> |        |
|       |                                                       | 1-Nonene                              | 0.690  |
|       |                                                       | 1-Decene                              | 0.725  |
|       |                                                       | 2-Decene, (E)-                        | 0.494  |
|       |                                                       | 1-Undecene                            | 1.082  |
|       |                                                       | 1-Tridecene                           | 0.826  |
|       |                                                       | 1-Tetradecene                         | 0.956  |
|       |                                                       | 9-Octadecene, (E)-                    | 6.071  |
|       |                                                       | 1-Pentadecene                         | 4.342  |
|       |                                                       | 5-Octadecene, (E)-                    | 0.634  |
|       |                                                       | 5-Eicosene, (E)-                      | 1.102  |
|       |                                                       | 3-Heptadecene, (Z)-                   | 8.544  |
|       |                                                       | 5-Octadecene, (E)-                    | 0.402  |
|       |                                                       | 5-Heptadecene                         | 0.712  |
|       |                                                       | 9-Octadecene, (E)-                    | 0.243  |
|       | Heavy                                                 | 1-Docosene                            | 0.203  |



|  |                                                    |  |  |
|--|----------------------------------------------------|--|--|
|  | Hydrocarbon<br>(C <sub>21</sub> -C <sub>24</sub> ) |  |  |
|--|----------------------------------------------------|--|--|

**List of Supplementary Data**

**Fig. S1.** TGA profile for the MWCNT and MWCNT supported catalysts.

**Fig. S2.** (a) TPD-NH<sub>3</sub> analysis and (b) TPD-CO<sub>2</sub> profile for the MWCNT and MWCNT supported catalysts.

**Fig. S3.** X-ray diffraction for (a) Ni-Mg<sub>n</sub>/MWCNT (b) Ni-Mn<sub>n</sub>/MWCNT with different Mg and Mn concentration (n=5-20 wt %).

**Fig. S4.** TPD-NH<sub>3</sub> analysis of (a) Ni-Mg<sub>n</sub>/MWCNT (b) Ni-Mn<sub>n</sub>/MWCNT and TPD-CO<sub>2</sub> (c) Ni-Mg<sub>n</sub>/MWCNT (d) Ni-Mn<sub>n</sub>/MWCNT with different Mg and Mn concentration (n=5-20 wt %).

**Fig. S5.** TGA for fresh and spent (a) Ni<sub>10</sub>-Mg<sub>15</sub>/MWCNT and (b) Ni<sub>10</sub>-Mn<sub>5</sub>/MWCNT catalysts.

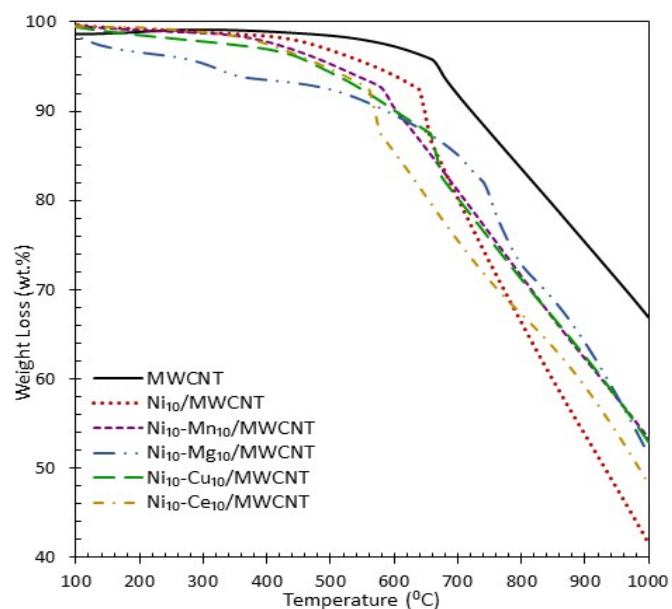

**Fig. S1.** TGA profile for the MWCNT and MWCNT supported catalysts.

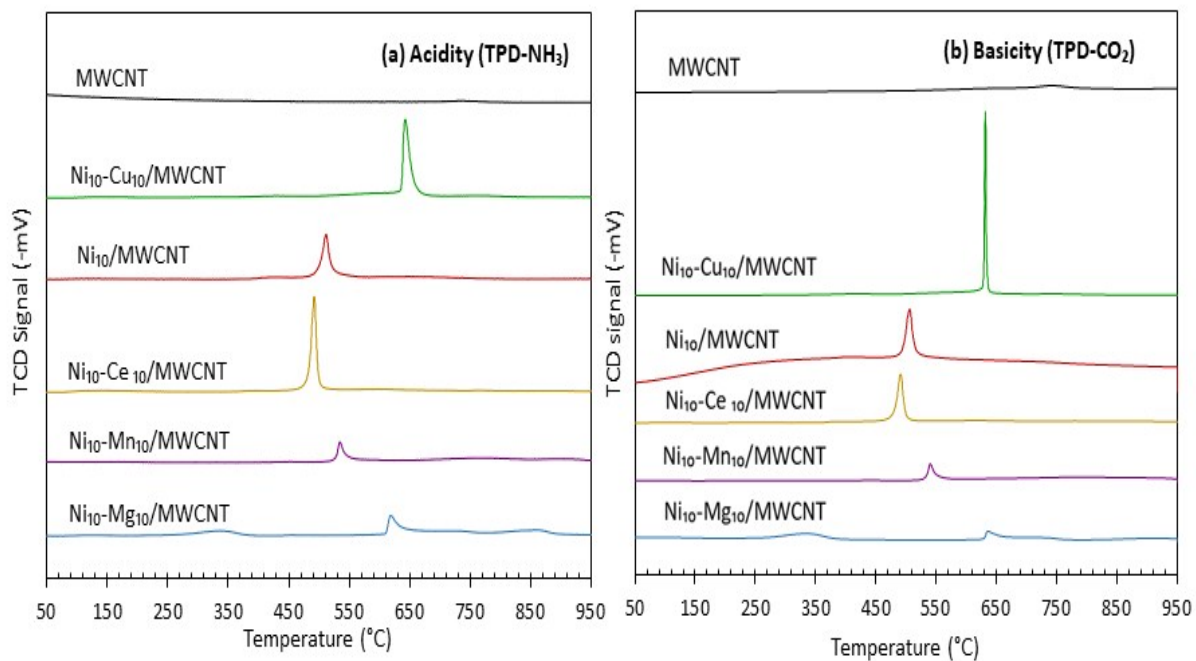

**Fig. S2.** (a) TPD-NH<sub>3</sub> analysis and (b) TPD-CO<sub>2</sub> profile for the MWCNT and MWCNT supported catalysts.

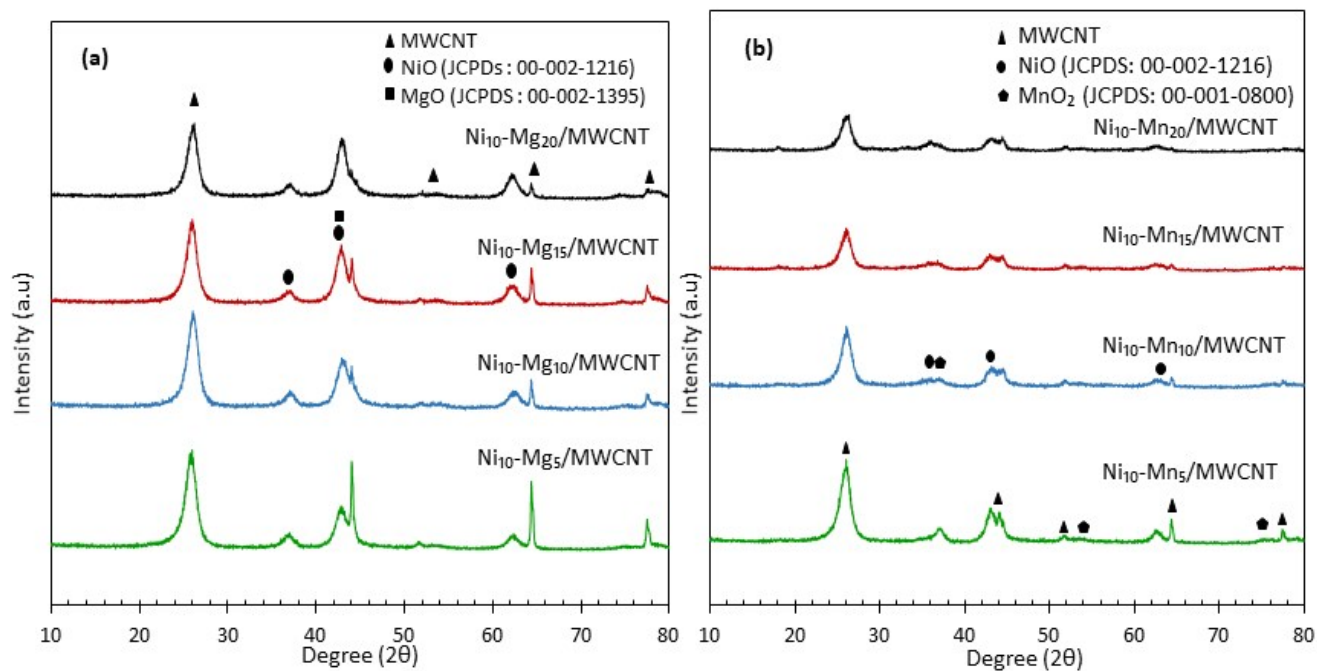

**Fig. S3.** X-ray diffraction for (a) Ni-Mg<sub>n</sub>/MWCNT (b) Ni-Mn<sub>n</sub>/MWCNT with different Mg and Mn concentration (n=5-20 wt %).

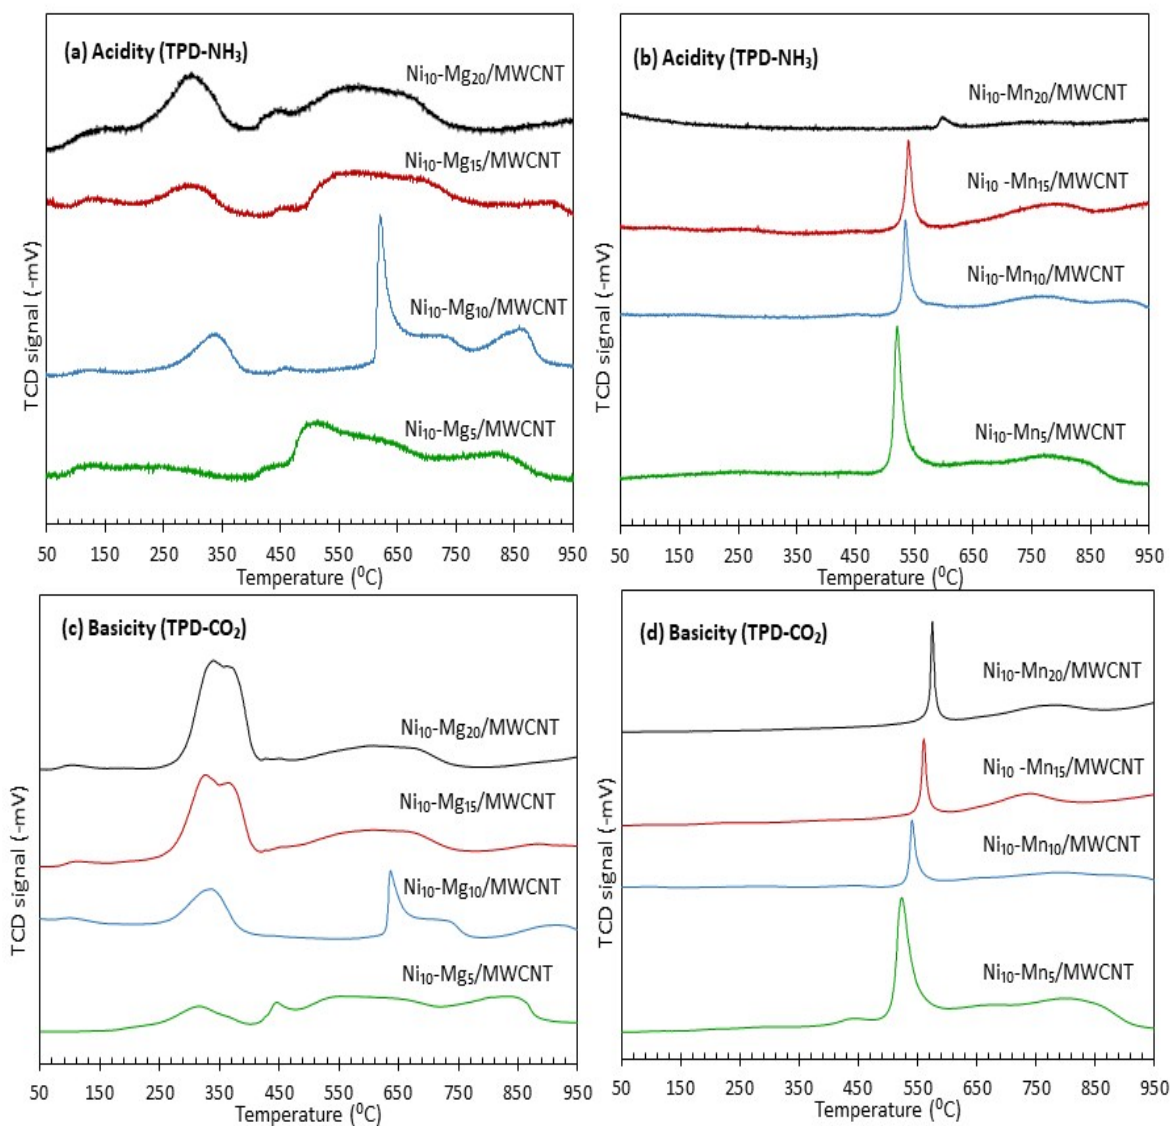

**Fig. S4** .TPD-NH<sub>3</sub> analysis of (a) Ni-Mg<sub>n</sub>/MWCNT (b) Ni-Mn<sub>n</sub>/MWCNT and TPD-CO<sub>2</sub> (c) Ni-Mg<sub>n</sub>/MWCNT (d) Ni-Mn<sub>n</sub>/MWCNT with different Mg and Mn concentration (n=5-20 wt %).

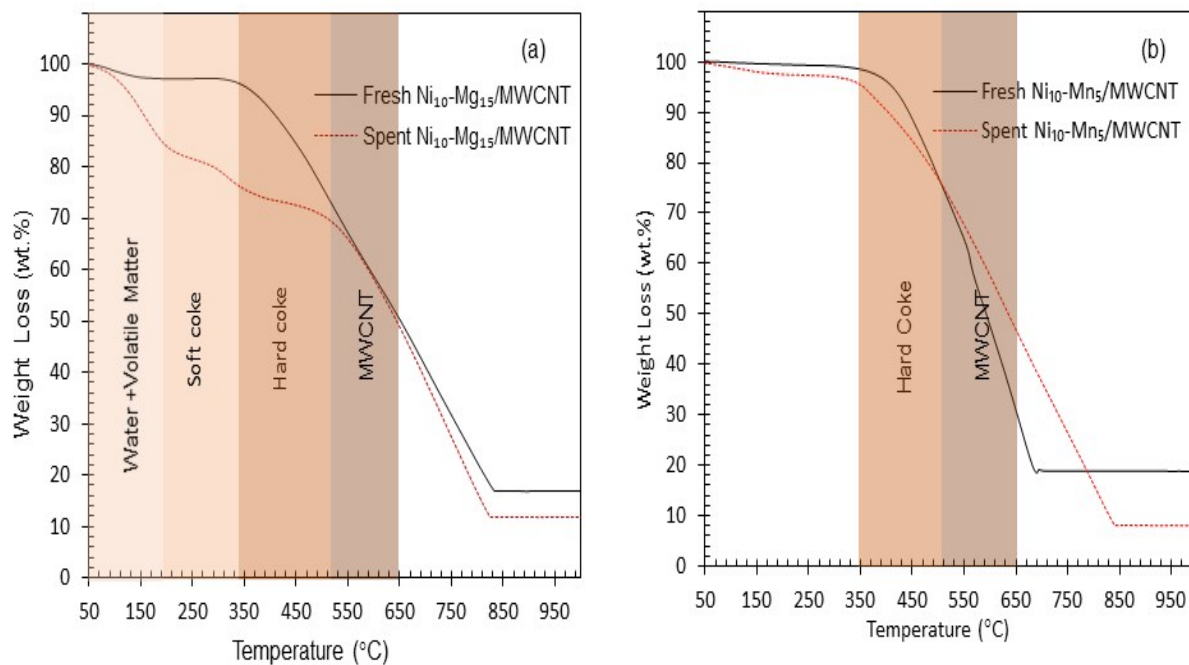

**Fig S5.** TGA for fresh and spent (a) Ni<sub>10</sub>-Mg<sub>15</sub>/MWCNT and (b) Ni<sub>10</sub>-Mn<sub>5</sub>/MWCNT catalysts.
